# Supplementary material for: Construction of a health education pathway for patients with gynecologic malignancies based on evidence-based and LEARNS models
Source: Research Square preprint supplement (doi:10.21203/rs.3.rs-6323668/v1), 2025-05-09
Supplement: Supplementary file 1 [file ae2c59618a9ccb91739196eb.docx]

Table1.Health education pathway for patients with gynecologic malignancies

| Level 1 indicators | LEARNS model | Secondary indicators | YES | NO |
| --- | --- | --- | --- | --- |
| Day of admission | L(listen) | ① Listen to the patient's complaints; |  |  |
| ② Listen to the patient's physical needs; |  |  |
| ③ Listen to the psychological needs of the patient; |  |  |
| ④ Listen to the social needs of patients; |  |  |
| E (establish) | Make a good impression and build initial rapport |  |  |
| A (adopt) | ①Welcome patients warmly and introduce the regulations, environment, and system of the department, as well as the director of the department, the head nurse, the doctor in charge, and the nurse in charge; |  |  |
| ②To obtain general information about the patient's family support and economic conditions; |  |  |
| ③ Introduce disease-related knowledge, dietary precautions, and targeted personalized psychological guidance to patients and their families; |  |  |
| ④ Instruct the patient on relevant examination items and precautions; |  |  |
| ⑤ Introduce the health education platform to patients and their families. |  |  |
| R(reinforce) | Do a good job of disease-related health education to patients and their families, and answer questions and answers from patients and their families. |  |  |
| N(name) | Use the LEARNS model Gynecologic Oncology Patient Health Education Pathway form to document and develop a plan of care based on the patient's condition; ask questions about issues presented and explained; and encourage self-reporting. |  |  |
| S(strengthen) | Correct any responses that the patient misunderstands and repeat for emphasis. |  |  |
| The day before surgery | L(listen) | Listening to patients' and families' perceptions of the disease and surgery |  |  |
| E (establish) | Further Development of harmonized partnerships |  |  |
| A (adopt) | ① Instruct patients and family members to watch mission-related videos and read health manuals and health education pushes carefully; |  |  |
| ② Keep the skin clean to prevent postoperative infection; |  |  |
| ③ Prepare the respiratory tract with effective coughing and sputum methods; |  |  |
| ④ Prepare the intestinal tract; instruct the patient to eat a preoperative diet: rotten noodles or rotten noodle skin or steamed eggs at noon, easy-to-digest food (millet porridge, egg soup) for dinner, and forbid pasta, fruits, vegetables, etc., and determine the time when the patient is forbidden to drink water. |  |  |
| ⑤ Postoperative complication education as well as prevention: For example, measures to prevent VTE include instructing patients on postoperative ankle pumping exercises, straight leg raising and lower extremity flexion, turning in bed, hip lifting exercises, and getting out of bed; |  |  |
| ⑥Instruction in postoperative Diet and principles; |  |  |
| ⑦ Focus on the psychological care of patients, especially emphasizing to patients that removal of the uterus/ovaries/vulva is only a treatment (and not a physical defect) and guiding them to correctly understand the surgery based on the results of the psychological assessment. |  |  |
| R(reinforce) | Uniformly trained nursing staff will carefully guide patients and their families in reading the health education booklet, supplemented by an on-site demonstration of postoperative living conditions and care, to improve their understanding and mastery of the condition. |  |  |
| N(name) | Feedback on patients' and families' knowledge and skill mastery through the question-answer-question model and further improve health education based on patients' feedback results |  |  |
| S(strengthen) | Distribution of health education brochures, communication among patients, and viewing of the content of the education platform |  |  |
| The day after surgery | L(listen) | ①Listen to the patient's subjective feelings |  |  |
| ②Listen to the patient's current needs |  |  |
| E (establish) | ①Build a harmonious relationship that allows patients to trust |  |  |
| ② Conducting postoperative instruction based on the concept of rapid surgical rehabilitation |  |  |
| A (adopt) | ① Postoperative position, method of bed movement, and early bed movement; |  |  |
| ②Purpose and duration of postoperative fasting; |  |  |
| ③ Postoperative cardiac monitoring and vital sign monitoring considerations; |  |  |
| ④ Instruct on the significance, timing, and precautions of leaving various tubes in place; |  |  |
| ⑤ Oxygenation education, effective postoperative coughing methods and techniques; |  |  |
| ⑥Postoperative incision dressings, adjunctive therapy (limb pneumatic pressure, red light) |  |  |
| ⑦ Response to postoperative pain, nausea, and other discomforts; |  |  |
| ⑧ Names, effects, and adverse reactions of postoperative medications; |  |  |
| ⑨ Postoperative psychological reassurance to relieve patient anxiety; |  |  |
| ⑩Specialist guidance: self-observation and monitoring of vaginal bleeding. |  |  |
| R(reinforce) | A detailed explanation of the key points of postoperative care is needed to improve patients' and their families' awareness of and familiarity with the education content. |  |  |
| N(name) | Encourage patients or family members to demonstrate the process and key points on the spot. For example, on the spot, let the patient demonstrate how to do ankle pump exercise and why it is necessary. The educator should raise questions and give guidance to correct any misunderstandings. |  |  |
| S(strengthen) | Encourage the patient and family to review surgical precautions, knowledge of the disease, and heart thoughts. |  |  |
| During postoperative hospitalization | L(listen) | ①Listen to the patient for postoperative discomfort. |  |  |
| ② Listen to what problems the patient has with adaptation to surgery and nursing care |  |  |
| ③ Ask patients and families if there are unresolved issues with current care and what new issues have arisen |  |  |
| E (establish) | The charge nurse clarifies whether a therapeutic partnership has been established with the patient |  |  |
| A (adopt) | ①Select appropriate educational methods according to the actual situation of the patients, such as watching videos and explaining practical operations, etc., and introduce postoperative precautions to the patients and their families. |  |  |
| ②Early bed activities: gradually increase the number of bed activities and activity time to prevent postoperative intestinal obstruction; |  |  |
| ③ Drainage tube care: the significance of tube retention and precautions; observation of drainage fluid; risk assessment of extubation; guidance on extubation, etc.; |  |  |
| ④Pain management: pain assessment; analgesic drug management; pain relief methods; strengthen pain education; |  |  |
| ⑤Instruction on incision care: observation of incision drainage and healing, etc.; |  |  |
| ⑥Focusing on the psychological state of patients: exploring patients' feelings related to the disease since its onset, the adverse emotions they have developed, and their fears and worries about the recurrence of the disease; |  |  |
| ⑦Instructing patients to change negative emotions: introducing patients to real cases of cured gynecological tumor patients living positively; adopting the methods of guidance, comfort, and encouragement to make patients face up to the elimination of current problems; mobilizing the family support system; and guiding family members to take care of them to increase patients' confidence in recovery; |  |  |
| ⑧Encourage patients to participate in self-care as early as possible, arrange peer education, strengthen communication among patients, and enhance patients' confidence in self-care. |  |  |
| ⑨Self-care: Patients and their families participate in developing and guiding future rehabilitation programs, etc. |  |  |
| R(reinforce) | ①Guide patients or their families to understand gynecologic tumors and correctly recognize the characteristics of the disease |  |  |
| ② Emphasize the importance of maintaining a positive mood; |  |  |
| N(name) | ① Encourage patients or family members to review their knowledge of the tumor and correct any misunderstandings promptly |  |  |
| ② Evaluate the learning effect of patients and their families, summarize and sort out the problems of understanding difficulties with patients, and further rectification of the subject team members |  |  |
| S(strengthen) | ① Encourage patients and their families to watch the video explanation of the mission center repeatedly; |  |  |
| ②Take different forms of intensive education for the contents that are ineffective in the mission. |  |  |
| The day before discharge | L(listen) | Conduct interviews to understand the patient's knowledge of the disease in the hospital, whether new confusion arises during the period, solve the patient's related problems in a timely manner, and leave a hotline for receiving relevant feedback from the patient after discharge and follow-up to strengthen the education. |  |  |
| E (establish) | Always stand in the patient's point of view, respect the patient's participation in decision-making, rationally adopt the views of the patient, and gradually reach a consensus |  |  |
| A (adopt) | ①Management of cleanliness: keep the abdominal incision clean and dry after discharge from the hospital, remove the stitches for one week and then shower (prohibit the basin bath), keep the perineum clean, and change the underwear diligently; |  |  |
| ② Diet: After discharge from the hospital, the Diet should be light and easy to digest; it should be high in protein, vitamins, and minerals. |  |  |
| ③Activity: Combine work and rest. Hysterectomized patients do not lift heavy objects within 2 months. Avoid violent coughing and other actions that increase abdominal pressure. |  |  |
| ④Sexual life: Sexual life can be resumed after 3 months for total hysterectomy and 1 month for other surgeries. |  |  |
| ⑤Guidance on taking medication with you when you leave the hospital: How to take and use it. |  |  |
| ⑥Self-care of incisions: Incision healing; |  |  |
| ⑦Discharge procedures: Processing, expense reimbursement settlement, etc; |  |  |
| ⑧Guidance on postoperative follow-up: regular outpatient follow-up, adjuvant radiotherapy, and situations that warrant immediate follow-up in the hospital; |  |  |
| ⑨ Family and social life guidance: postoperative reintegration guidance, change of poor lifestyle. |  |  |
| R(reinforce) | Re-explain the areas where patients have doubts, encourage patients to learn from each other, ask questions, and make sure that patients have mastered all the knowledge and skills until the end |  |  |
| N(name) | Re-evaluate the learning effect of patients and their families to check whether they can correctly articulate their understanding of the key points of oncology care and apply them to their daily lives. |  |  |
| S(strengthen) | Encourage patients and families to deepen their understanding and knowledge of oncology and nursing care through a variety of means |  |  |
| Follow-up 1 month after discharge | L(listen) | To follow up with patients outside the hospital by telephone and Internet, and to understand patients' confusion and difficulties in daily life after discharge from the hospital. |  |  |
| E (establish) | Further, it strengthens the already constructed therapeutic partnership with the patient. |  |  |
| A (adopt) | ①Postoperative follow-up: any abnormal vaginal bleeding; urination and defecation after discharge from the hospital; any urinary fistula; any sexual life; any swelling of the lower limbs (obstruction of lymphatic reflux); any occurrence of VTE; whether to have a review and the time of the review. |  |  |
| ②Guide patients to review the learning during this period, share the gains of participating in the activities and the benefits to disease recovery, and give personalized guidance based on the feedback results. |  |  |
| ③Patients with malignant tumors involve follow-up treatment and symptom care. |  |  |
| R(reinforce) | A combination of approaches to emphasize daily living considerations when conditions permit |  |  |
| N(name) | Patients and families are asked to follow the instructions in their daily lives and compare how they have changed previously |  |  |
| S(strengthen) | Encourage patients to continue to seek community service resources after discharge, and inform patients of social resources available to them after discharge |  |  |
